# Supplementary material
Source: PubMed Central journal article supplement (PMC3204356)
Supplement: NIHMS322509-supplement-01.pdf [file NIHMS322509-supplement-01.pdf]

**Item S1.** Venous thrombosis ICD-9 codes.

- 415.1.1 - pulmonary embolism and infarction
- 415.11 - iatrogenic pulmonary embolism and infarction
- 415.19 - other pulmonary embolism/infarction
- 451 - phlebitis and thrombophlebitis
  - 451.11 - femoral vein
  - 451.19 - other deep vein
  - 451.2 - lower extremities, unspecified
    - 451.81 - iliac vein
    - 451.83 - deep veins of upper extremities
    - 451.84 - upper extremity, unspecified
    - 451.89 - other (axillary, jugular, subclavian)
  - 451.9 - unspecified site
- 453.1 - thrombophlebitis migrans
  - 453.2 - vena cava
  - 453.8 - of other specified veins
  - 453.9 - of unspecified site
- 671.3 (0,1,3) - deep phlebothrombosis, antepartum
- 671.4 (0,2,4) - deep phlebothrombosis, postpartum
- 671.9 (0-4) - unspecified venous complication of puerperium
- 673.2 (0-4) -obstetrical blood clot embolism
- 996.73 - Complication due to renal dialysis device, implant, and graft
- 996.74 - Complication due to other vascular device, implant, and graft
- 997.2 - phlebitis or thrombophlebitis during or resulting from a procedure
